# Supplementary material for: Community-based screening for obstetric fistula in Nigeria: a novel approach
Source: PubMed Central journal article supplement (PMC3905156; doi:10.1186/1471-2393-14-44), 2014-01-24
Supplement: 1471-2393-14-44-S1.pdf [file 1471-2393-14-44-S1.pdf]

**PRE-SCREENING INTERVIEW (NIGERIA)**

|     | SCREENING ID NUMBER                                                                                                             | <input type="text"/>                                                                                                                                                                                                                                                                                                                                             |                    |
|-----|---------------------------------------------------------------------------------------------------------------------------------|------------------------------------------------------------------------------------------------------------------------------------------------------------------------------------------------------------------------------------------------------------------------------------------------------------------------------------------------------------------|--------------------|
| #   | QUESTIONS                                                                                                                       |                                                                                                                                                                                                                                                                                                                                                                  | SKIP               |
|     | <b>BACKGROUND INFORMATION</b>                                                                                                   |                                                                                                                                                                                                                                                                                                                                                                  |                    |
| 1.  | What is your age?                                                                                                               | <input type="text"/>                                                                                                                                                                                                                                                                                                                                             |                    |
| 2.  | Which religion do you belong to?                                                                                                | Christian.....0<br>Muslim.....1<br>Other.....2<br>If Other, please specify_____                                                                                                                                                                                                                                                                                  |                    |
| 3.  | What is your marital status?                                                                                                    | Married/Cohabiting.....0<br>Divorced/Separated.....1<br>Widowed.....2<br>Single.....3                                                                                                                                                                                                                                                                            |                    |
| 4.  | What is the highest degree of formal education that you attained? (Not including Islamic/Arabic education)                      | None.....0<br>Primary.....1<br>Secondary.....2<br>More than Secondary.....3<br>Don't Know/Missing.....9                                                                                                                                                                                                                                                          |                    |
| 5.  | Which community do you currently live in?                                                                                       | _____                                                                                                                                                                                                                                                                                                                                                            |                    |
| 6.  | Which LGA do you currently live in?                                                                                             | Bekwarra.....0<br>Yala.....1<br>Abi.....2<br>Akamkpa.....3<br>Akpabuyo.....4<br>Bakassi.....5<br>Biase.....6<br>Boki.....7<br>Calabar Municipal.....8<br>Calabar South.....9<br>Etung.....10<br>Ikom.....11<br>Obanliku.....12<br>Obubra.....13<br>Obudu.....14<br>Odukpani.....15<br>Ogoja.....16<br>Yakurr.....17<br>IF OTHER, please specify the STATE.....18 |                    |
| 7.  | How would you describe where you live? (RA responds based on the prior answers)                                                 | Urban.....0<br>Rural.....1<br>Don't know.....9                                                                                                                                                                                                                                                                                                                   |                    |
|     | <b>REPRODUCTIVE HEALTH</b>                                                                                                      |                                                                                                                                                                                                                                                                                                                                                                  |                    |
| 8.  | Now I would like to ask about all the births you have had during your life. Have you ever given birth before?                   | NO.....0<br>YES.....1                                                                                                                                                                                                                                                                                                                                            | If NO, skip #12    |
| 9.  | How many sons or daughters to whom you have given birth are alive?                                                              | SONS <input type="text"/><br>DAUGHTERS <input type="text"/>                                                                                                                                                                                                                                                                                                      |                    |
| 10. | Have you ever given birth to a boy or a girl who was born alive but later died?                                                 | NO.....0<br>YES.....1                                                                                                                                                                                                                                                                                                                                            | If NO, skip to #12 |
| 11. | How many boys or girls have died like this?                                                                                     | Boys dead <input type="text"/><br>Girls dead <input type="text"/>                                                                                                                                                                                                                                                                                                |                    |
| 12. | Have you ever lost a pregnancy? It might be spontaneously or when you or someone else had to do something to end the pregnancy. | NO.....0<br>YES.....1                                                                                                                                                                                                                                                                                                                                            | If NO, skip to #14 |
| 13. | How many pregnancies have you lost in your lifetime?                                                                            | <input type="text"/>                                                                                                                                                                                                                                                                                                                                             |                    |
| 14. | Some women have stillbirths, that is, they give birth in late pregnancy to a dead child.                                        | NO.....0<br>YES.....1                                                                                                                                                                                                                                                                                                                                            | If NO, skip to #16 |

|     |                                                                                                                                                                                                                                                                                                                                                                |                                                                                                                                                                                                                                                      |                      |
|-----|----------------------------------------------------------------------------------------------------------------------------------------------------------------------------------------------------------------------------------------------------------------------------------------------------------------------------------------------------------------|------------------------------------------------------------------------------------------------------------------------------------------------------------------------------------------------------------------------------------------------------|----------------------|
|     | Have you ever had a stillbirth?                                                                                                                                                                                                                                                                                                                                |                                                                                                                                                                                                                                                      |                      |
| 15. | How many stillbirths have you had in your lifetime?                                                                                                                                                                                                                                                                                                            | <input type="text"/>                                                                                                                                                                                                                                 |                      |
|     | <b>FISTULA-LIKE SYMPTOMS (DHS)</b><br>Sometimes a woman can have a problem such that she experiences a constant leakage of urine or stool from her vagina during the day and night. This problem usually occurs after a difficult childbirth, but may also occur after a sexual assault or after a pelvic surgery. This is called vesicovaginal fistula (VVF). |                                                                                                                                                                                                                                                      |                      |
| 16. | Have you ever experienced a constant leakage of urine or stool from your vagina during the day and night?                                                                                                                                                                                                                                                      | NO.....0<br>YES.....1                                                                                                                                                                                                                                | If NO, skip to #31   |
| 17. | Did this problem occur within the last 12 months?                                                                                                                                                                                                                                                                                                              | NO.....0<br>YES.....1                                                                                                                                                                                                                                | If YES, skip to #19  |
| 18. | What year did this problem occur?                                                                                                                                                                                                                                                                                                                              | <input type="text"/>                                                                                                                                                                                                                                 |                      |
| 19. | Did this problem occur after a delivery?                                                                                                                                                                                                                                                                                                                       | NO.....0<br>YES.....1                                                                                                                                                                                                                                | If YES, skip to #20  |
| b.  | Did this problem occur after an operation in your pelvic area? (pelvic surgery)                                                                                                                                                                                                                                                                                | NO.....0<br>YES.....1                                                                                                                                                                                                                                | If YES, skip to #26  |
| c.  | Did this problem occur after some other event?                                                                                                                                                                                                                                                                                                                 | NO.....0<br>YES.....1<br>If OTHER, please specify.....2                                                                                                                                                                                              |                      |
|     | RA CONFIRMATION QUESTION FOR THE TOOL:<br>Problem after delivery?                                                                                                                                                                                                                                                                                              | NO.....0<br>YES.....1                                                                                                                                                                                                                                | If NO, skip to #26   |
| 20. | Did this problem occur after a normal labor and delivery, or after a very difficult labor and delivery?                                                                                                                                                                                                                                                        | Normal Labor/Delivery.....0<br>Very Difficult Delivery.....1                                                                                                                                                                                         |                      |
| 21. | Where did the delivery take place?                                                                                                                                                                                                                                                                                                                             | Home.....0<br>Facility.....1                                                                                                                                                                                                                         | If HOME, skip to #24 |
| 22. | How long after the labor pains began did you go to the facility?                                                                                                                                                                                                                                                                                               | <12 hours.....0<br>12-24 hours.....1<br>>24 hours.....2<br>I don't know.....9                                                                                                                                                                        |                      |
| 23. | Did you get a cesarean section at the facility?                                                                                                                                                                                                                                                                                                                | NO.....0<br>YES.....1                                                                                                                                                                                                                                |                      |
| 24. | Was this baby born alive?                                                                                                                                                                                                                                                                                                                                      | NO.....0<br>YES.....1                                                                                                                                                                                                                                |                      |
| 25. | After which delivery did this occur?                                                                                                                                                                                                                                                                                                                           | Delivery Number <input type="text"/>                                                                                                                                                                                                                 |                      |
| 26. | How many days after (ANSWER TO QUESTION #19) did the leakage start?                                                                                                                                                                                                                                                                                            | Number of days after the precipitating event<br><input type="text"/><br>(Enter 99, if more than 99 days)                                                                                                                                             |                      |
| 27. | Have you sought treatment for this condition?                                                                                                                                                                                                                                                                                                                  | NO.....0<br>YES.....1                                                                                                                                                                                                                                | If YES, skip to #29  |
| 28. | Why have you not sought treatment?<br>(Multiple options available)                                                                                                                                                                                                                                                                                             | Did not know how it could be fixed.....0<br>Do not know where to go.....1<br>Too expensive.....2<br>Too far.....3<br>Poor quality of care.....4<br>Could not get permission.....5<br>Embarrassment.....6<br>If Other, please specify.....7<br>_____7 |                      |
|     | RA CONFIRMATION QUESTION FOR THE TOOL:<br>Treatment sought?                                                                                                                                                                                                                                                                                                    | NO.....0<br>YES.....1                                                                                                                                                                                                                                | If NO, skip to #31   |
| 29. | From whom did you last seek treatment?                                                                                                                                                                                                                                                                                                                         | Health Professional<br>Doctor/Clinical Officer.....0<br>Nurse/Midwife.....1<br>Patient Attendant.....2<br>Other Person<br>Untrained village doctor.....3<br>Traditional Birth Attendants (TBA).....4<br>If Other, please specify.....5               |                      |

|                                                                                                            |                                                                                                                                                                                 |                                                                                                                                                                                                                             |                         |
|------------------------------------------------------------------------------------------------------------|---------------------------------------------------------------------------------------------------------------------------------------------------------------------------------|-----------------------------------------------------------------------------------------------------------------------------------------------------------------------------------------------------------------------------|-------------------------|
| 30.                                                                                                        | Did the treatment stop the problem?                                                                                                                                             | YES, No more leakage at all.....0<br>YES, But still some leakage.....1<br>NO, Still have problem.....2                                                                                                                      |                         |
| 31.                                                                                                        | Are there any (other) women in your household who suffer from vesicovaginal fistula/obstetric fistula?                                                                          | NO.....0<br>YES.....1                                                                                                                                                                                                       |                         |
| 32.                                                                                                        | How many (other) women in your household suffer from vesicovaginal fistula/obstetric fistula?                                                                                   | Number <input type="text"/> <input type="text"/><br>Don't Know.....99                                                                                                                                                       | If NO, skip to #34      |
| 33.                                                                                                        | Did she/they come or are they planning to come to the screening?                                                                                                                | NO.....0<br>YES.....1<br>Don't Know.....9                                                                                                                                                                                   |                         |
| <b>COMMUNICATION</b>                                                                                       |                                                                                                                                                                                 |                                                                                                                                                                                                                             |                         |
| 34.                                                                                                        | How did you hear about the screening today?                                                                                                                                     | The community organization.....0<br>The radio spots.....1<br>Family.....2<br>Acquaintance/Friend.....3<br>Town Crier.....4<br>Fistula patients.....5<br>If Other, please specify.....6                                      |                         |
| <b>Please let me know if you remember hearing any of the following messages (between questions 35-38):</b> |                                                                                                                                                                                 |                                                                                                                                                                                                                             |                         |
| 35.                                                                                                        | The continuous leakage of urine or feces or both through woman's private part is called a fistula.                                                                              | NO.....0<br>YES.....1<br>Don't Know.....9                                                                                                                                                                                   |                         |
| 36.                                                                                                        | This condition can be completely treated through surgical operation in the hospital.                                                                                            | NO.....0<br>YES.....1<br>Don't Know.....9                                                                                                                                                                                   |                         |
| 37.                                                                                                        | The women who are identified with this condition at the screening will be operated free of charge.                                                                              | NO.....0<br>YES.....1<br>Don't Know.....9                                                                                                                                                                                   |                         |
| 38.                                                                                                        | Women with other forms of leakage not related to fistula will be referred to other hospitals to get treatment, where they shall bear the cost of transportation and operations. | NO.....0<br>YES.....1<br>Don't Know.....9                                                                                                                                                                                   |                         |
| 39.                                                                                                        | How did you get to the clinic today?<br>(Multiple options available)                                                                                                            | On foot.....0<br>By bicycle.....1<br>By motorcycle.....2<br>By car.....3<br>By taxi/public moto.....4<br>By train.....5<br>By cart.....6<br>By using animals such as donkey, camel etc..7<br>If Other, please specify.....8 |                         |
| 40.                                                                                                        | Did you come to the screening by yourself?                                                                                                                                      | NO.....0<br>YES.....1                                                                                                                                                                                                       | If YES, skip to the END |
| 41.                                                                                                        | Who accompanied you to the screening?                                                                                                                                           | Husband.....0<br>Mother/Father.....1<br>Sister/Brother.....2<br>Friend/Acquaintance.....3<br>If Other, please specify.....4                                                                                                 |                         |
| <b>THANK YOU VERY MUCH FOR YOUR TIME. NOW, I'LL TAKE YOU BACK TO THE WAITING AREA.</b>                     |                                                                                                                                                                                 |                                                                                                                                                                                                                             |                         |

Name of the interviewer:  
Date of the interview:

|                      |                      |                      |
|----------------------|----------------------|----------------------|
| day                  | month                | year                 |
| <input type="text"/> | <input type="text"/> | <input type="text"/> |
